# Supplementary material for: Novel Antimicrobial Peptides from a Cecropin-Like Region of Heteroscorpine-1 from Heterometrus laoticus Venom with Membrane Disruption Activity
Source: MDPI journal article supplement (doi:10.3390/molecules26195872), 2021-09-28
Supplement: s1 [file s1]

Sample Name :CeHS-1 GP  
Sample ID :U461AFJ270-3  
Time Processed :10:39:10 AM  
Month-Day-Year Processed :12/12/2020

Pump A : 0.065% trifluoroacetic in 100% water (v/v)  
Pump B : 0.05% trifluoroacetic in 100% acetonitrile (v/v)  
Total Flow:1 ml/min  
Wavelength:220 nm

<<LC Time Program>>

| Time  | Module     | Command | Value |
|-------|------------|---------|-------|
| 0.01  | Pumps      | B.Conc  | 5     |
| 25.00 | Pumps      | B.Conc  | 65    |
| 25.01 | Pumps      | B.Conc  | 95    |
| 27.00 | Pumps      | B.Conc  | 95    |
| 27.01 | Pumps      | B.Conc  | 5     |
| 35.00 | Pumps      | B.Conc  | 5     |
| 35.01 | Controller | Stop    |       |

<<Column Performance>>

<Detector A>

Column :Inertsil ODS-3 4.6 x 250 mm  
Equipment: ZJ17010508

### <Chromatogram>

mV

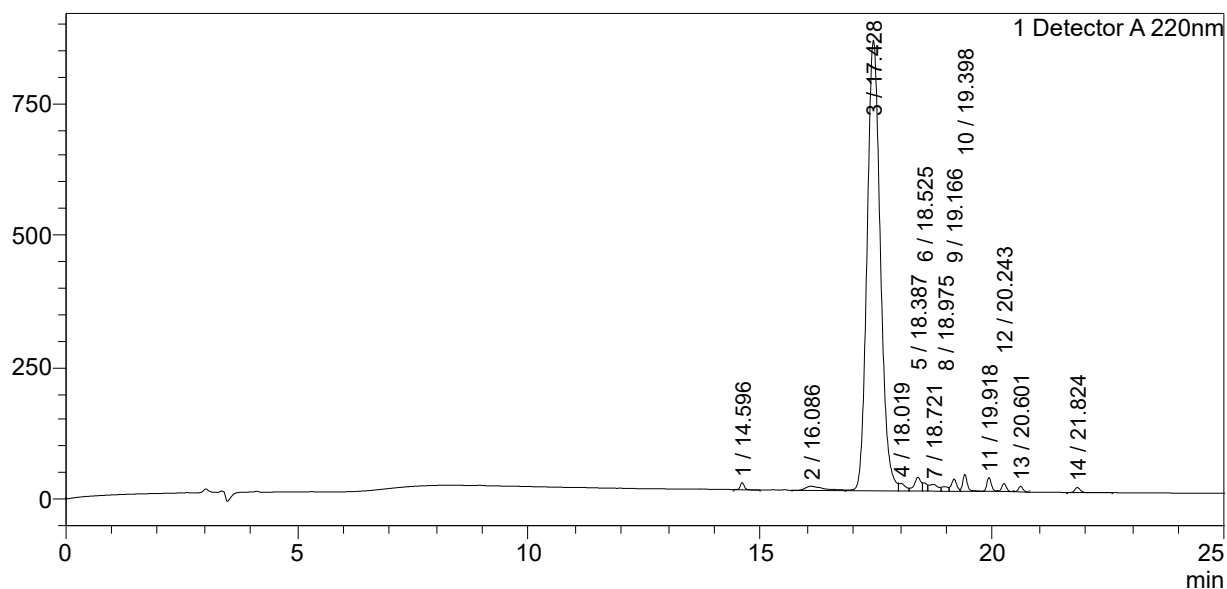

### <Peak Table>

Detector A 220nm

| Peak# | Ret. Time | Area     | Height  | Area%   |
|-------|-----------|----------|---------|---------|
| 1     | 14.596    | 81360    | 13610   | 0.431   |
| 2     | 16.086    | 227719   | 8021    | 1.205   |
| 3     | 17.428    | 16994249 | 853880  | 89.925  |
| 4     | 18.019    | 136979   | 14281   | 0.725   |
| 5     | 18.387    | 270894   | 26305   | 1.433   |
| 6     | 18.525    | 109452   | 15655   | 0.579   |
| 7     | 18.721    | 148978   | 12711   | 0.788   |
| 8     | 18.975    | 94597    | 8467    | 0.501   |
| 9     | 19.166    | 184083   | 23036   | 0.974   |
| 10    | 19.398    | 224557   | 32004   | 1.188   |
| 11    | 19.918    | 178056   | 26440   | 0.942   |
| 12    | 20.243    | 102117   | 15164   | 0.540   |
| 13    | 20.601    | 67839    | 10531   | 0.359   |
| 14    | 21.824    | 77417    | 9418    | 0.410   |
| Total |           | 18898297 | 1069523 | 100.000 |
