# Supplementary material for: Novel Antimicrobial Peptides from a Cecropin-Like Region of Heteroscorpine-1 from Heterometrus laoticus Venom with Membrane Disruption Activity
Source: MDPI journal article supplement (doi:10.3390/molecules26195872), 2021-09-28
Supplement: s1 [file s1]

Sample Name :CeHS-1 GPK  
Sample ID :U461AFJ270-5  
Time Processed :12:51:01 AM  
Month-Day-Year Processed :12/09/2020

Pump A : 0.065% trifluoroacetic in 100% water (v/v)  
Pump B : 0.05% trifluoroacetic in 100% acetonitrile (v/v)

Total Flow:1 ml/min

Wavelength:220 nm

<<LC Time Program>>

| Time  | Module     | Command       | Value |
|-------|------------|---------------|-------|
| 0.01  | Pumps      | Pump A B.Conc | 5     |
| 25.00 | Pumps      | Pump A B.Conc | 65    |
| 25.01 | Pumps      | Pump A B.Conc | 95    |
| 27.00 | Pumps      | Pump A B.Conc | 95    |
| 27.01 | Pumps      | Pump A B.Conc | 5     |
| 35.00 | Pumps      | Pump A B.Conc | 5     |
| 35.01 | Controller | Stop          |       |

<<Column Performance>>

<Detector A>

Column :Inertsil ODS-3 4.6 x 250 mm

Equipment: GK11010009

### <Chromatogram>

mV

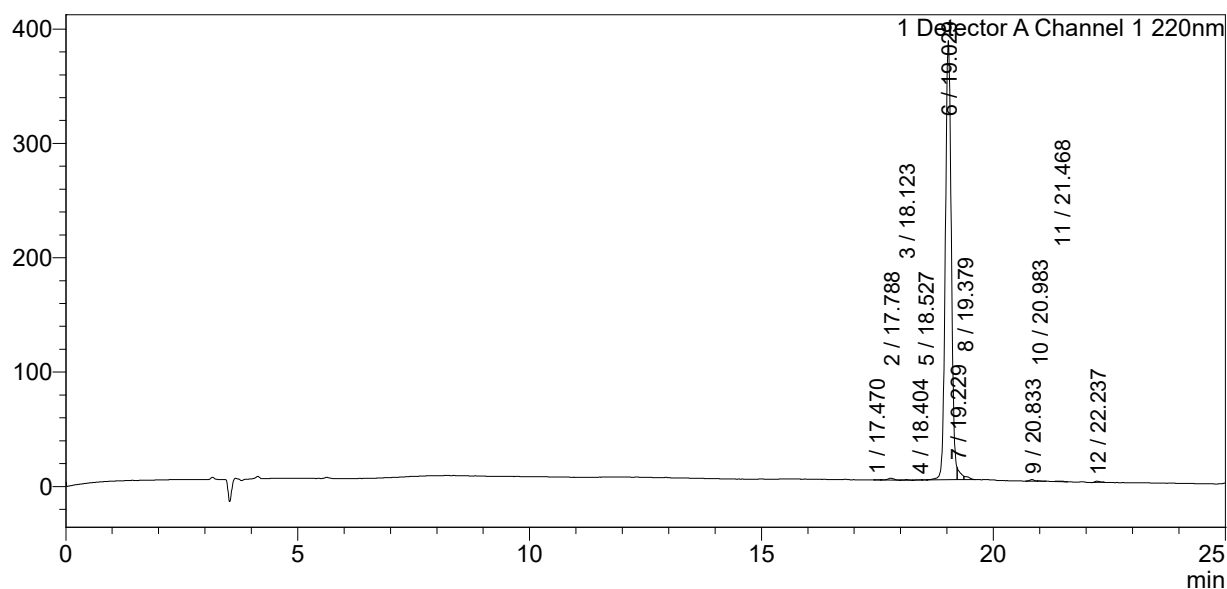

### <Peak Table>

Detector A Channel 1 220nm

| Peak# | Ret. Time | Area    | Height | Area%   |
|-------|-----------|---------|--------|---------|
| 1     | 17.470    | 1050    | 171    | 0.030   |
| 2     | 17.788    | 15007   | 1678   | 0.423   |
| 3     | 18.123    | 3102    | 429    | 0.088   |
| 4     | 18.404    | 926     | 162    | 0.026   |
| 5     | 18.527    | 900     | 144    | 0.025   |
| 6     | 19.029    | 3426331 | 384111 | 96.679  |
| 7     | 19.229    | 52383   | 9799   | 1.478   |
| 8     | 19.379    | 20299   | 2809   | 0.573   |
| 9     | 20.833    | 9963    | 1448   | 0.281   |
| 10    | 20.983    | 1641    | 293    | 0.046   |
| 11    | 21.468    | 5435    | 571    | 0.153   |
| 12    | 22.237    | 6990    | 1041   | 0.197   |
| Total |           | 3544027 | 402657 | 100.000 |
