# Supplementary material for: Novel Antimicrobial Peptides from a Cecropin-Like Region of Heteroscorpine-1 from Heterometrus laoticus Venom with Membrane Disruption Activity
Source: MDPI journal article supplement (doi:10.3390/molecules26195872), 2021-09-28
Supplement: s1 [file s1]

Sample Name : CeHS-1  
 Sample ID :U461AFJ270-1  
 Time Processed: 3:51:25  
 Year-Month-Day: 2020/12/16

Pump A : 0.065% trifluoroacetic in 100% water (v/v)  
 Pump B : 0.05% trifluoroacetic in 100% acetonitrile (v/v)  
 Total Flow:1 ml/min

<<Detector A>>

Wavelength Ch1 : 220 nm

<<LC Time Program>>

| Time  | Module     | Command         | Value | Comment |
|-------|------------|-----------------|-------|---------|
| 0.01  | Pumps      | Solvent B Conc. | 5     |         |
| 25.00 | Pumps      | Solvent B Conc. | 65    |         |
| 25.01 | Pumps      | Solvent B Conc. | 95    |         |
| 27.00 | Pumps      | Solvent B Conc. | 95    |         |
| 27.01 | Pumps      | Solvent B Conc. | 5     |         |
| 33.00 | Pumps      | Solvent B Conc. | 5     |         |
| 33.01 | Controller | Stop            |       |         |

<<Column Performance>>

<Detector A>

Column : Inertsil ODS-3 4.6 x 250 mm

Equipment:ZJ19010015

### <Chromatogram>

mV

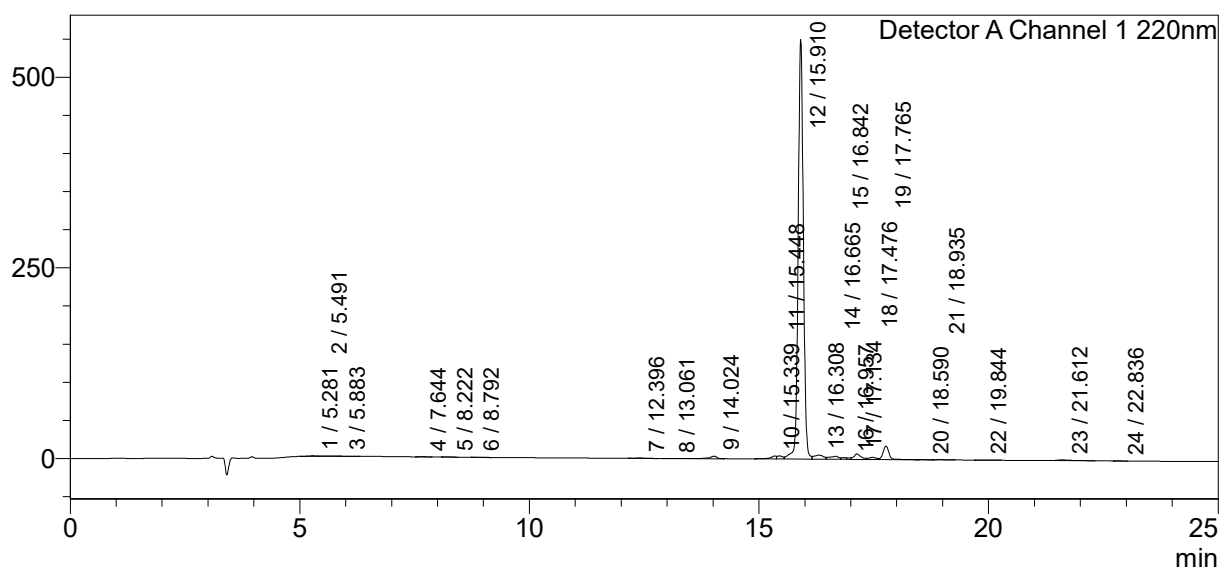

### <Peak Table>

Detector A Channel 1 220nm

| Peak# | Ret. Time | Area    | Height | Area%  |
|-------|-----------|---------|--------|--------|
| 1     | 5.281     | 9725    | 898    | 0.197  |
| 2     | 5.491     | 12762   | 551    | 0.258  |
| 3     | 5.883     | 4534    | 331    | 0.092  |
| 4     | 7.644     | 2404    | 249    | 0.049  |
| 5     | 8.222     | 1625    | 141    | 0.033  |
| 6     | 8.792     | 1978    | 117    | 0.040  |
| 7     | 12.396    | 9032    | 550    | 0.183  |
| 8     | 13.061    | 3022    | 248    | 0.061  |
| 9     | 14.024    | 39773   | 3359   | 0.804  |
| 10    | 15.339    | 36871   | 3815   | 0.745  |
| 11    | 15.448    | 34451   | 4134   | 0.696  |
| 12    | 15.910    | 4328726 | 550172 | 87.504 |
| 13    | 16.308    | 76579   | 5397   | 1.548  |
| 14    | 16.665    | 56302   | 4015   | 1.138  |

| Peak# | Ret. Time | Area    | Height | Area%   |
|-------|-----------|---------|--------|---------|
| 15    | 16.842    | 15393   | 2203   | 0.311   |
| 16    | 16.957    | 11235   | 2077   | 0.227   |
| 17    | 17.134    | 76893   | 7255   | 1.554   |
| 18    | 17.476    | 32135   | 2847   | 0.650   |
| 19    | 17.765    | 158729  | 17626  | 3.209   |
| 20    | 18.590    | 1419    | 156    | 0.029   |
| 21    | 18.935    | 5299    | 506    | 0.107   |
| 22    | 19.844    | 3164    | 169    | 0.064   |
| 23    | 21.612    | 23321   | 1000   | 0.471   |
| 24    | 22.836    | 1518    | 203    | 0.031   |
| Total |           | 4946891 | 608020 | 100.000 |
